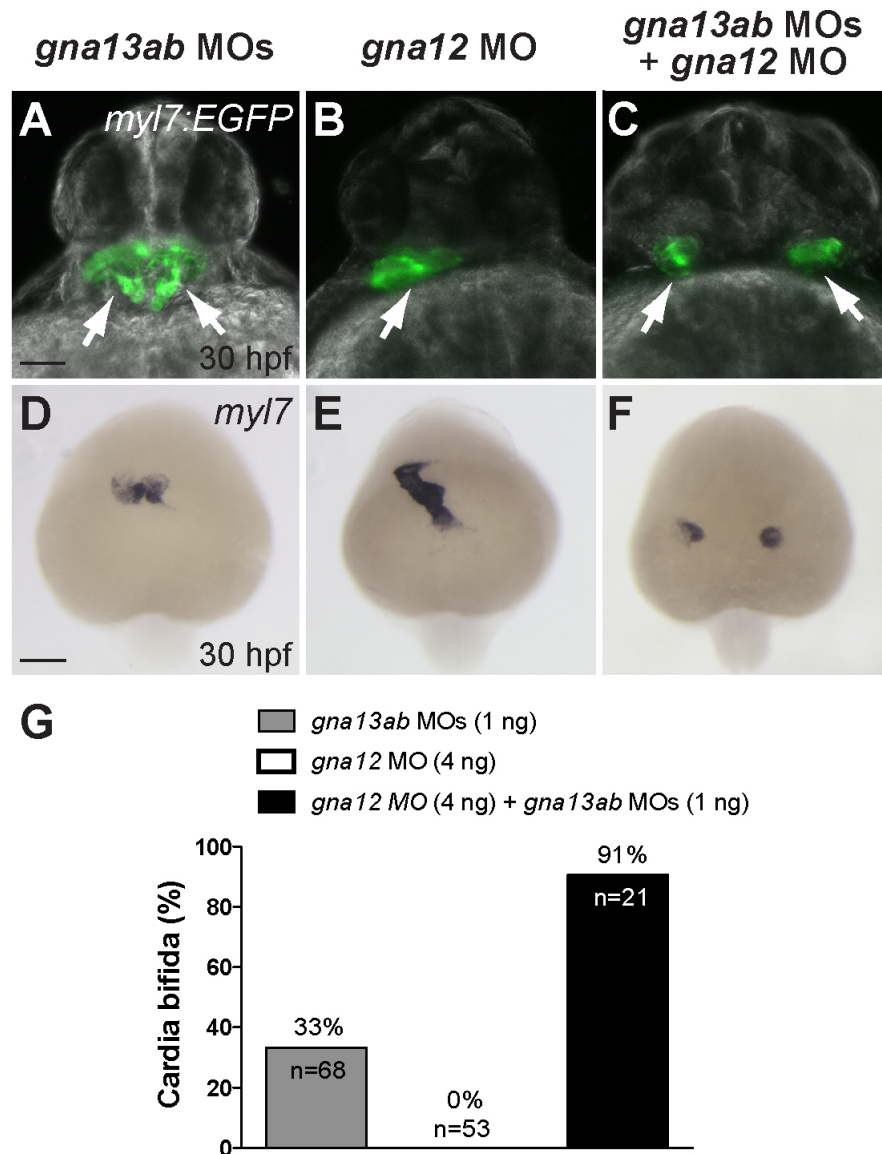

**Fig. S1.  $G\alpha_{12}$  and  $G\alpha_{13}$  have partially redundant roles in myocardial migration.** *Tg(myI7:EGFP)* embryos injected with *gna13ab* MOs (1 ng each) and *gna12* MO (4 ng), alone or in combination, at 30 hpf. (A-C) Overlay of epifluorescence and bright-field images. Ventral view; white arrows indicate hearts. (D-F) *myl7* expression, as detected by in situ hybridization. Dorsoanterior view with anterior upwards. (G) Frequencies of indicated embryos that exhibit cardia bifida at 35 hpf. Scale bars: 100  $\mu$ m.

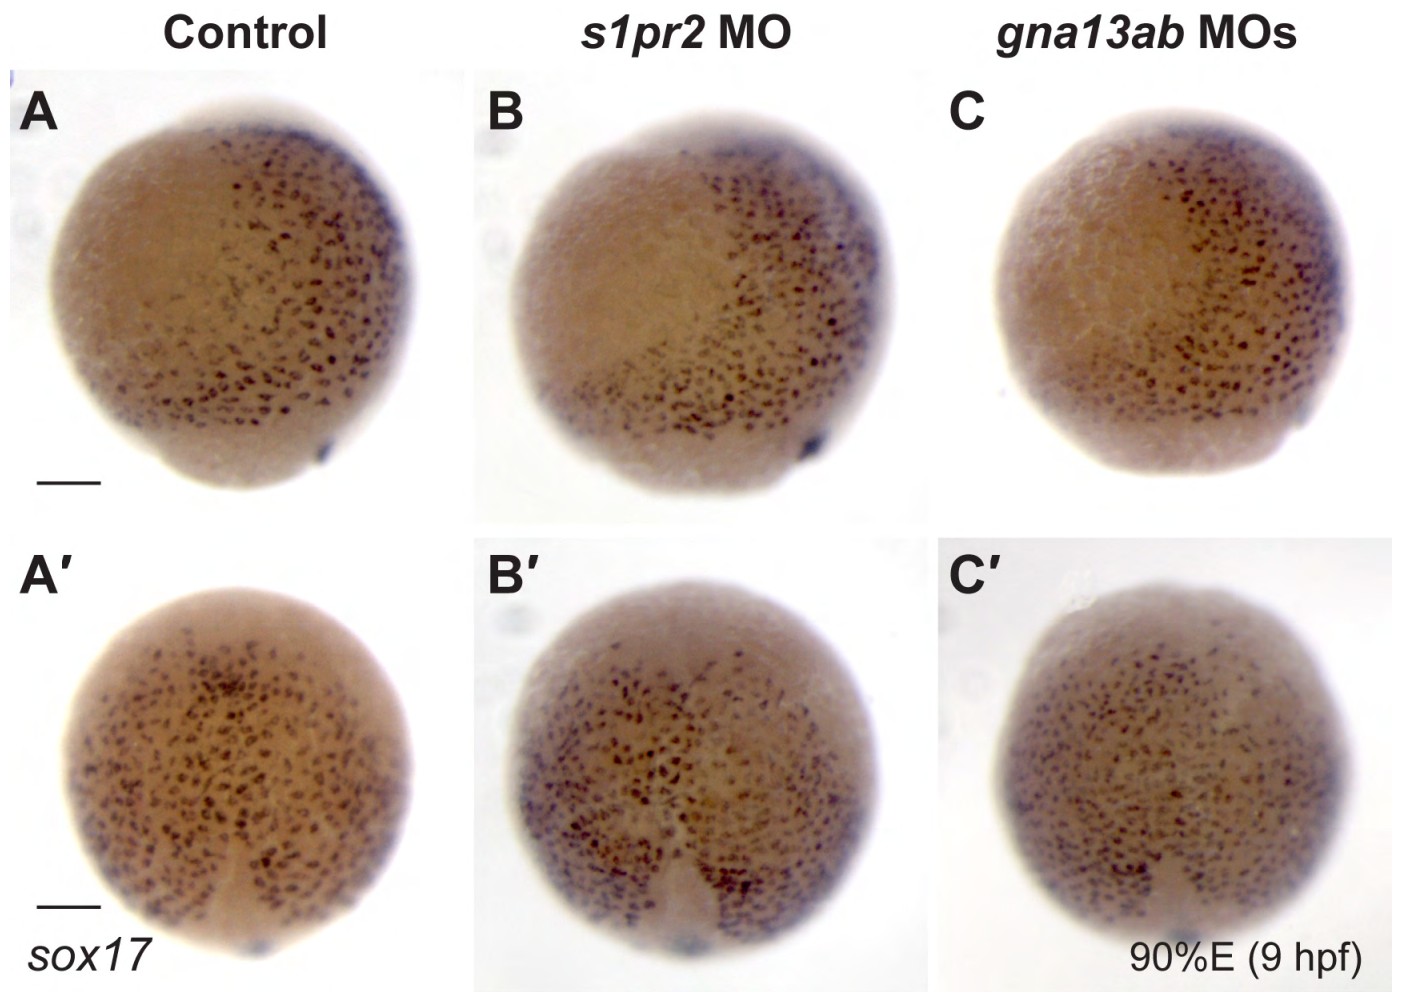

**Fig. S2. The migration and differentiation of endodermal cells are normal at gastrula stage, in embryos defective for  $S1pr2/G\alpha_{13}$  signaling.** *sox17* expression was examined by in situ hybridization in control ( $n=28$ ), *s1pr2/mil* MO- ( $n=28$ ) or *gna13ab* MOs-injected ( $n=29$ ) embryos, at 90% epiboly (9 hpf). (A-C) Dorsal view, anterior is upwards. (A'-C') Lateral view, dorsal is towards the right. The distribution of *sox17*-expressing endodermal cells appears to be normal in *s1pr2* or *gna13ab* morphants. Scale bars: 100  $\mu$ m.

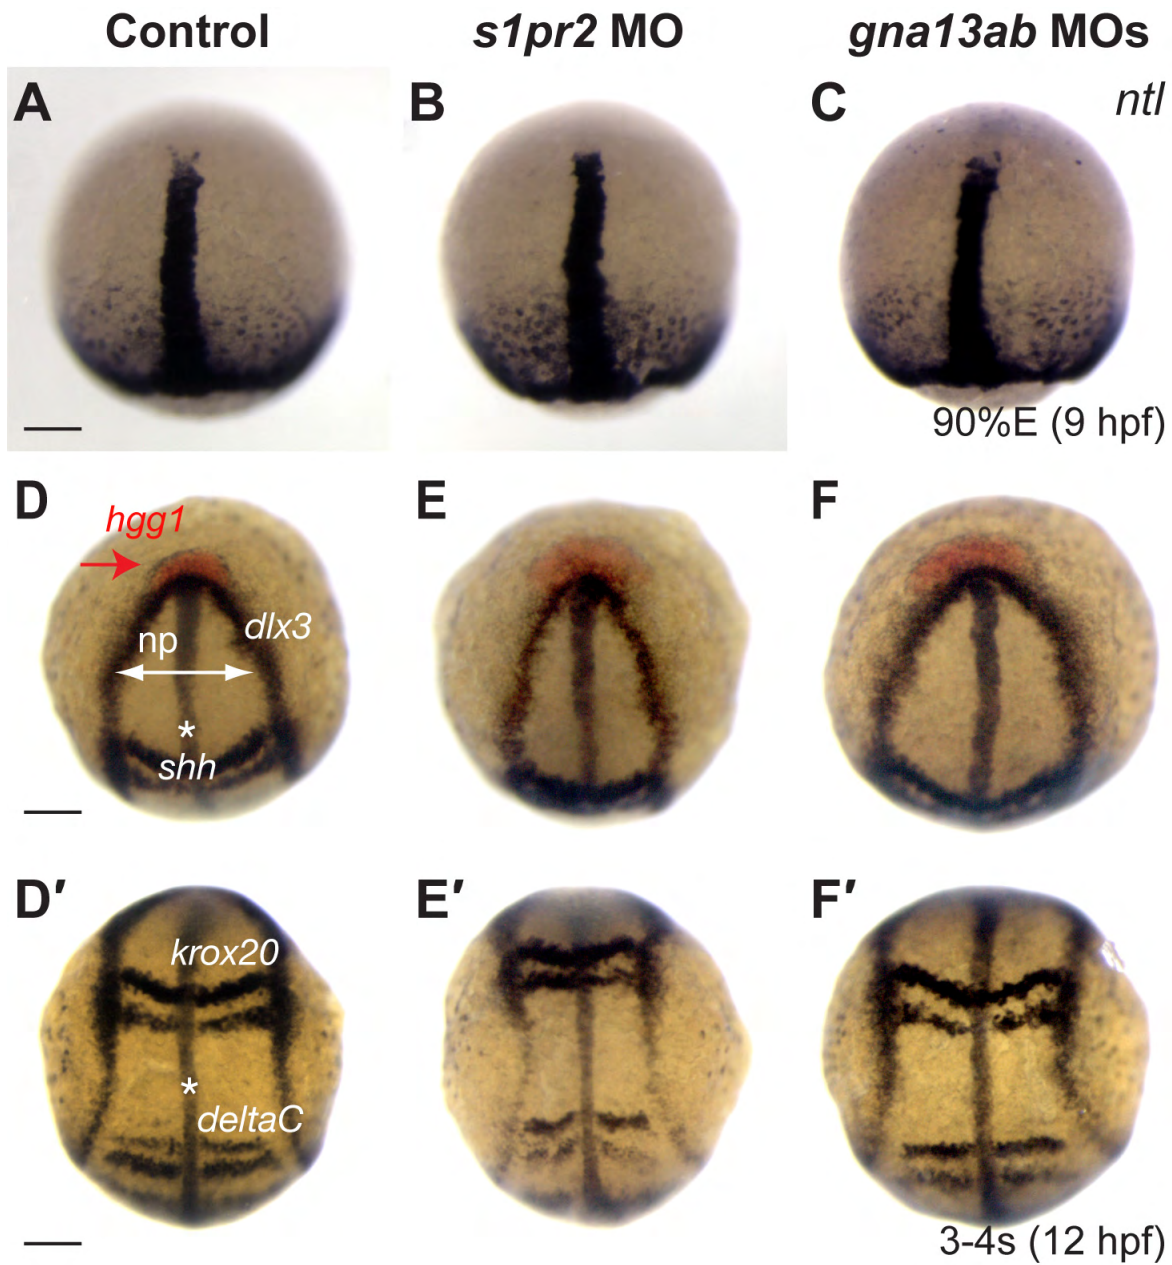

**Fig. S3.** Convergent and extension movements of the mesoderm and ectoderm are not affected by S1pr2/Ga<sup>13</sup> signaling during zebrafish gastrulation. (A-C) Expression of *ntl*, as detected by in situ hybridization, at 90% epiboly (9 hpf). Dorsal view. (D-F') Expression of *hgg1* (marks prechordal plate, red), *dlx3* (neural plate boundary), *krox20* (rhombomeres 3 and 5), *shh* (midline) and *deltaC* (somites) detected by in situ hybridization, at the 3- to 4-somite stage (12 hpf). (D-F) Dorsoanterior view; (D'-F') dorsal view; \*, notochord; white line with double arrows indicate neural plate (np). Scale bars: 100  $\mu$ m.

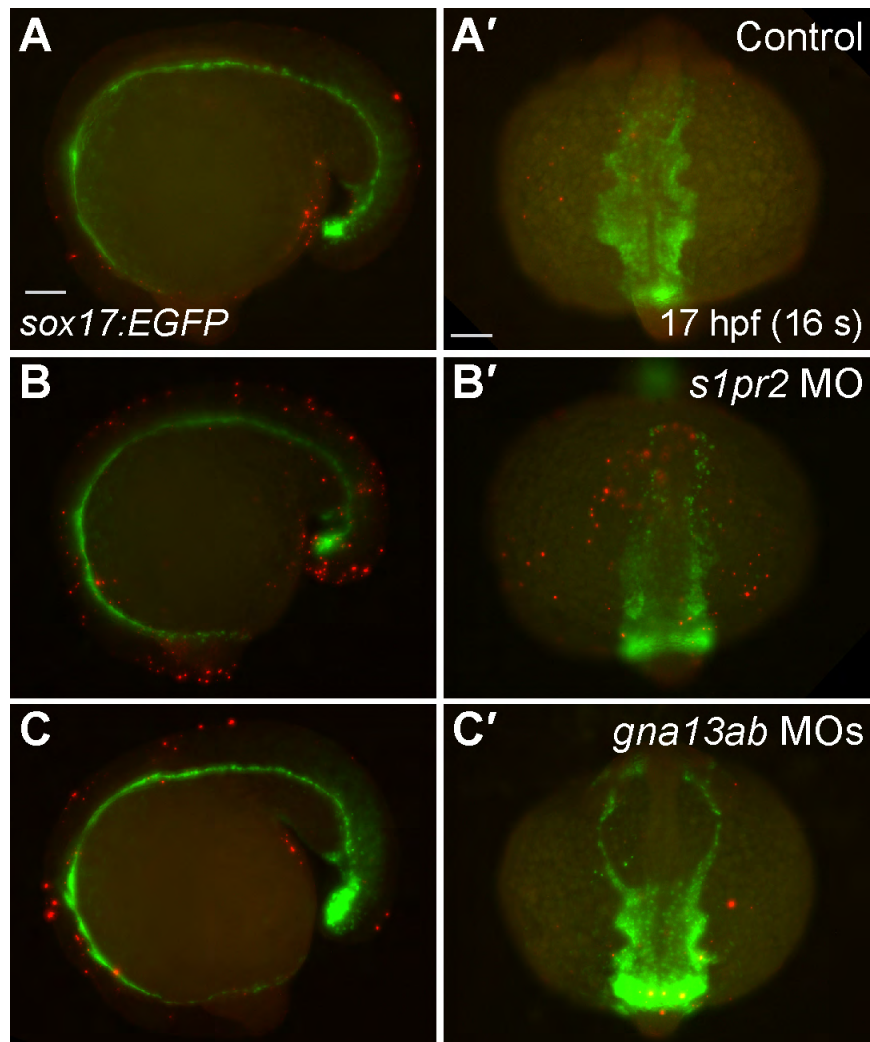

**Fig. S4. Defects in S1pr2/G $\alpha_{13}$  signaling do not induce apoptosis in the endoderm.** Whole-mount TUNEL assay was performed in 17 hpf (16-somite stage) *Tg(sox17:EGFP)* control embryos (A-A',  $n=15$ ) and embryos injected with the *s1pr2/mil* MO (B-B',  $n=15$ ) or *gna13ab* MOs (C-C',  $n=15$ ) using an apoptosis detection kit (ApoTag Red *in situ* apoptosis Detection Kit, Millipore) according to the manufacturer's instructions. Rhodamine-labeled apoptotic cells (red) are not detected in the EGFP-expressing endoderm. (A-C) Lateral view with anterior towards the left; (A'-C') dorsoanterior view with anterior upwards. Scale bars: 100  $\mu$ m.

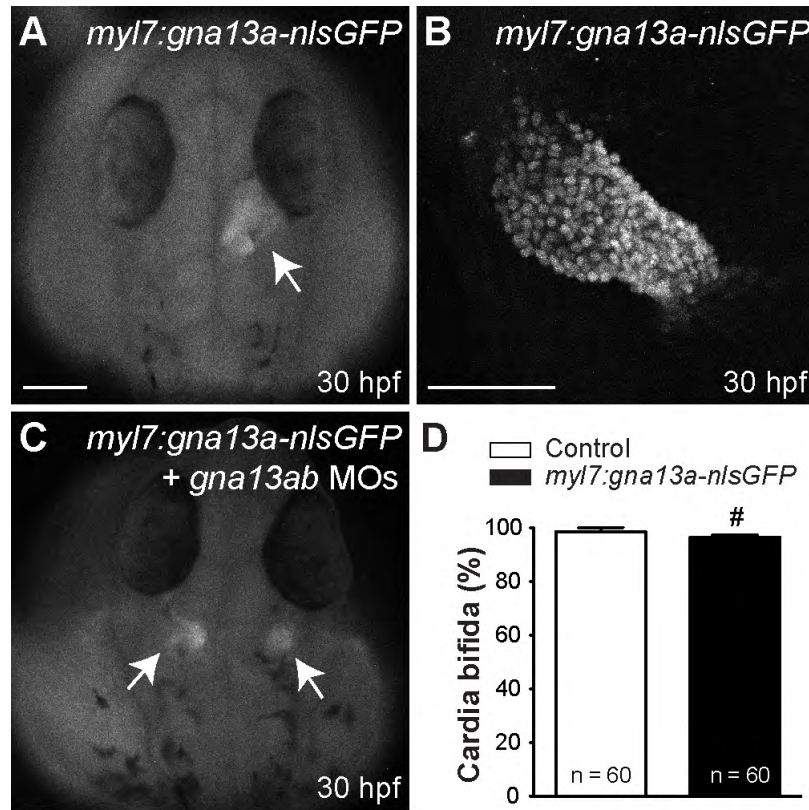

**Fig. S5. Cardiac-specific expression of  $G\alpha_{13}a$  fails to rescue cardia bifida caused by global  $G\alpha_{13}$  inhibition.** The transgene *myl7:gna13a-IRES-nlsGFP* was created using the Gateway system (Kwan et al., 2007; Villefranc et al., 2007), such that  $G\alpha_{13}a$  is expressed specifically in the myocardial cells under control of the *myl7* promoter (Huang et al., 2003). The expression of  $G\alpha_{13}a$  was monitored as nuclear GFP (nlsGFP) expression driven by an internal ribosomal entry site (IRES) (Kwan et al., 2007). The transgene plasmid DNA (50 pg) was co-injected with transposase RNA (30 pg) into the cytoplasm of wild-type embryos at the one-cell stage. A stable line expressing  $G\alpha_{13}a$  in the heart was identified. Injections of *gna13ab* MOs in *Tg(my17:gna13a-IRES-nlsGFP)* embryos still exhibited cardia bifida. (A) A representative epifluorescence image of 30 hpf-*Tg(my17:gna13a-IRES-nlsGFP)* embryos, showing expression of nlsGFP in the heart (arrow). (B) A confocal Z-stack image showing that nlsGFP is expressed in all cardiomyocytes of *Tg(my17:gna13a-IRES-nlsGFP)* embryos at 30 hpf. (C) A representative epifluorescence image of 30 hpf-*Tg(my17:gna13a-IRES-nlsGFP)* embryos injected with *gna13ab* MOs showing cardia bifida (arrows). (D) Frequencies of cardia bifida in 30-hpf embryos. # $P > 0.5$  versus control. Scale bar: 100  $\mu$ m.

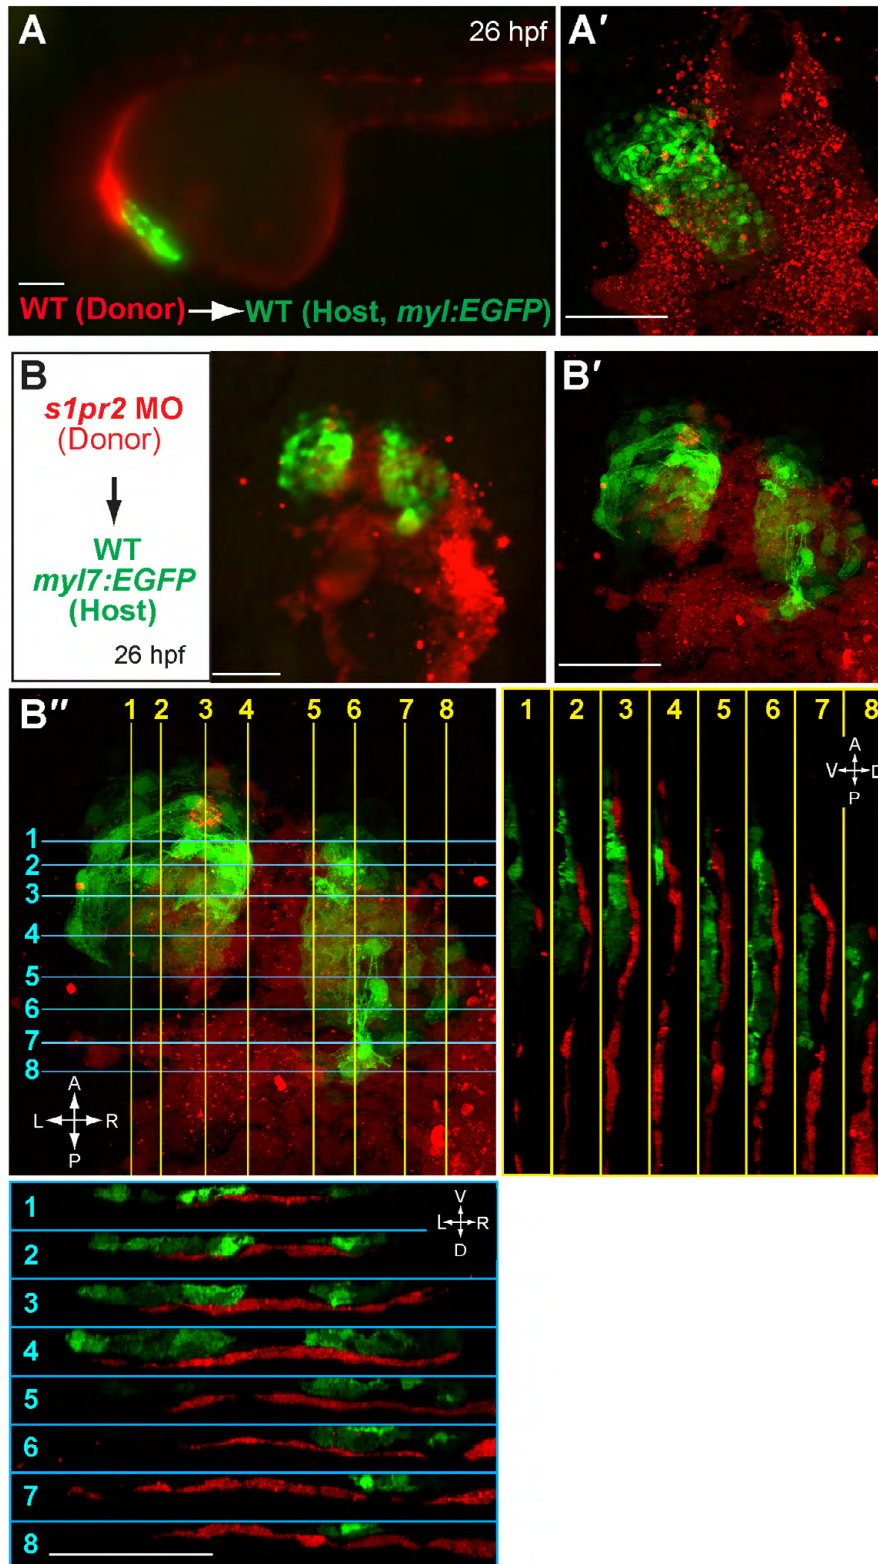

**Fig. S6. Donor cells do not contribute to myocardium when transplanted into endoderm.** Epifluorescence images (A,B) and confocal z-stack images (A',B') showing rhodamin-dextran labeled donor cells and GFP-labeled myocardium in host embryos at 26 hpf. (A-A') Wild-type donor cells were transplanted into wild-type hosts in the Tg(*myl7:EGFP*) background. (B-B'') *s1pr2* MO-injected donor cells were transplanted into wild-type hosts in the Tg(*myl7:EGFP*) background. (A) Lateral view; (A' B, B'' ventral view; (B'') orthogonal view of B' Blue lines indicate cross-section planes along the L/R axis of the embryos perpendicular to the midline; yellow lines indicate cross-section planes along the embryonic AP axis; blue and yellow lines are numbered to show the position of the corresponding orthogonal panel; the respective sections are shown within blue or yellow insets. A, anterior; P, posterior; L, left; R, right; D, dorsal, V, ventral. Scale bars: 100  $\mu$ m.

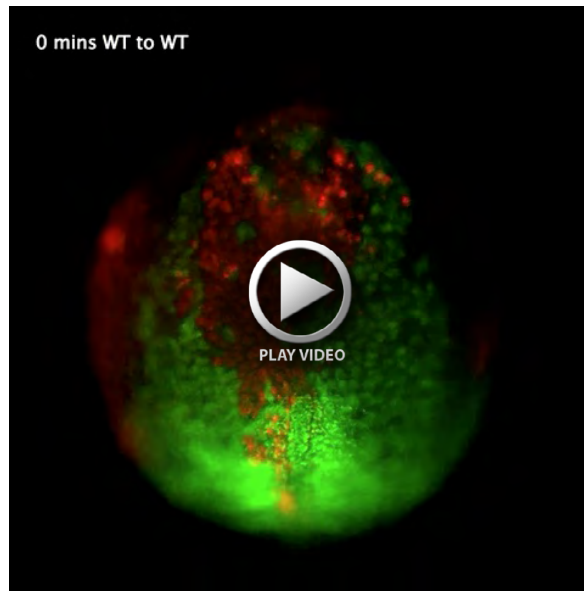

**Movie 1. Convergent movement of wild-type donor cells in wild-type host embryo.** Representative time-lapse movie of the anterior-region endoderm of a *Tg(sox17:EGFP)* embryo transplanted with sox32-expressing and rhodamine-labeled wild-type cells, from 10.5 hpf to 14 hpf (from 3 to 10 somites) at 25°C. Images were acquired at 5-minute intervals; the movie plays at 7 frames/second.

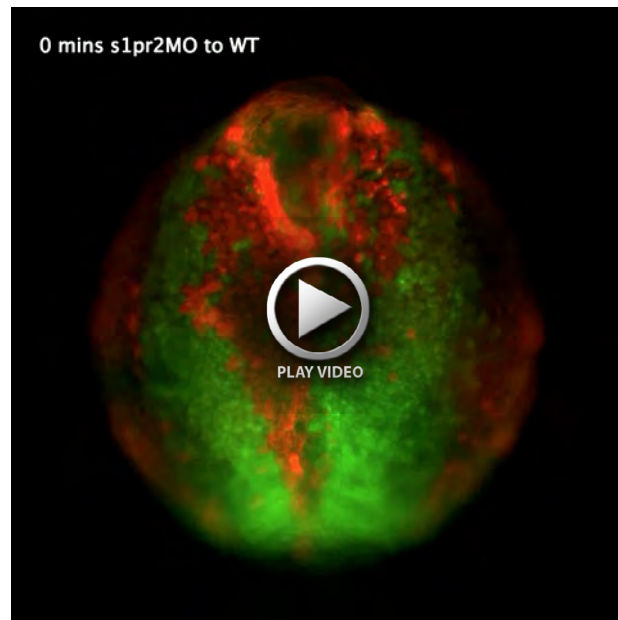

**Movie 2. Convergent movement of *s1pr2*-deficient donor cells in wild-type host embryo.** Representative time-lapse movie of the anterior-region endoderm of a *Tg(sox17:EGFP)* embryo transplanted with sox32-expressing, rhodamine-labeled *s1pr2* MO-injected cells from 10.5 hpf to 14 hpf (from 3 to 10 somites) at 25°C. Images were acquired at 5-minute intervals; the movie plays at 7 frames/second.

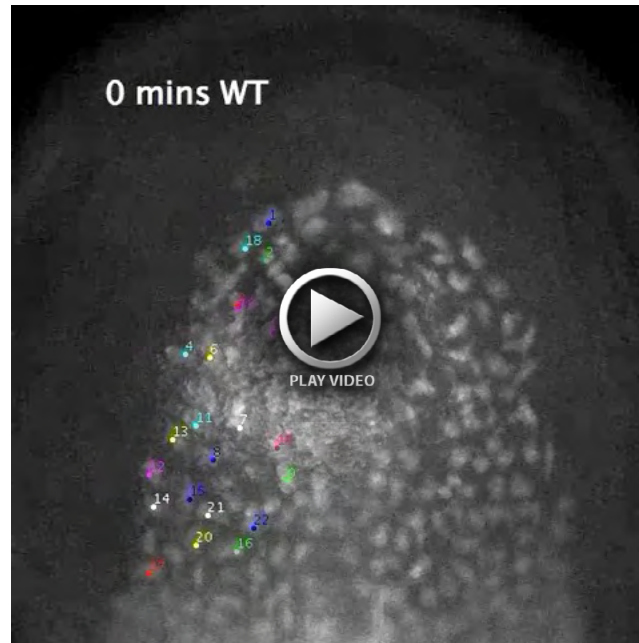

**Movie 3. Cell movements in the anterior endoderm of wild-type embryo.** Representative time-lapse movie of the most anterior region of the endoderm in a *Tg(sox17:EGFP)* embryo, from 12 hpf to 14.5 hpf (5 to 10 somites), at 25°C. Images were captured at 5-minute intervals, and the movie plays at 7 frames/second.

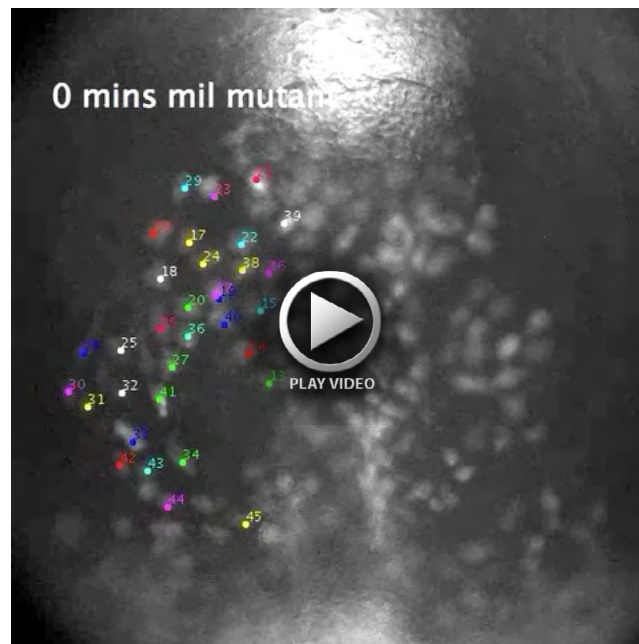

**Movie 4. Cell movements in the anterior endoderm of a *mil*<sup>93(-/-)</sup> embryo.** Representative time-lapse movie of the most anterior region of the endoderm in a *mil*<sup>93(-/-)</sup> embryo on a *Tg(sox17:EGFP)* background, from 12 hpf to 14.5 hpf (5 to 10 somites), at 25°C. Images were captured at 5-minute intervals, and the movie plays at 7 frames/second.



**Table S1. Genetic interactions**

| Manipulation                                                   | Number of embryos | % Embryos     |                 |
|----------------------------------------------------------------|-------------------|---------------|-----------------|
|                                                                |                   | Cardia bifida | Tail blistering |
| <i>gna13ab</i> MOs (0.5 ng each)                               | 45                | 6.7           | 20.0            |
| <i>s1pr2</i> MO (2.5 ng)                                       | 56                | 8.9           | 3.6             |
| <i>gna13ab</i> MOs (0.5 ng each)<br>+ <i>s1pr2</i> MO (2.5 ng) | 49                | 73.5          | 81.6            |
| <i>arhgef11RGS</i> RNA (250 pg)                                | 45                | 17.8          | 15.6            |
| <i>arhgef11RGS</i> RNA (250 pg)<br>+ <i>s1pr2</i> MO (2.5 ng)  | 45                | 73.3          | 47.2            |

Embryos were injected with the indicated MOs or RNAs at the one-cell stage and raised at 32°C. The frequency of embryos exhibiting cardia bifida and tail blistering was assessed at 32 hpf and 48 hpf, respectively.
